# Supplementary material for: Biocompatible recombinant type III collagen enhancing skin repair and anti-wrinkle effects
Source: Royal Society of Chemistry journal article supplement (doi:10.1039/d4bm01284d), 2024-01-01
Supplement: d4bm01284d1.pdf [file d4bm01284d1.pdf]

## Supporting Information

### Biocompatible Recombinant Type III Collagen Enhancing Skin Repair and Anti-Wrinkle Effects

Mingzhu Ye <sup>a, c, d</sup>, Yirui Fan <sup>a, d</sup>, Caihong Fu <sup>a, d</sup>, Huixia He, <sup>b, d\*</sup> Jianxi Xiao <sup>a, c, d\*</sup>

<sup>a</sup>State Key Laboratory of Applied Organic Chemistry, College of Chemistry and Chemical Engineering, Lanzhou University, Lanzhou 730000, P. R. China

<sup>b</sup>College of School of Life Sciences, Lanzhou University, Lanzhou 730000, P. R. China

<sup>c</sup>College of Earth and Environmental Sciences, Lanzhou University, Lanzhou 730000, P. R. China

<sup>d</sup>Gansu Engineering Research Center of Medical Collagen, Lanzhou 730000, PR China

Email: [xiaojx@lzu.edu.cn](mailto:xiaojx@lzu.edu.cn); [hehuix@lzu.edu.cn](mailto:hehuix@lzu.edu.cn).

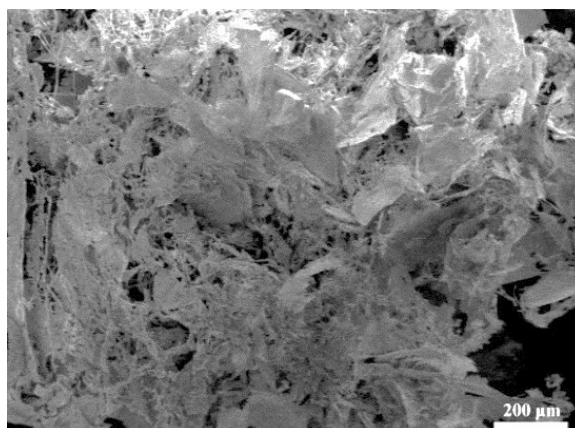

Fig. S1 SEM image of the rCol III.

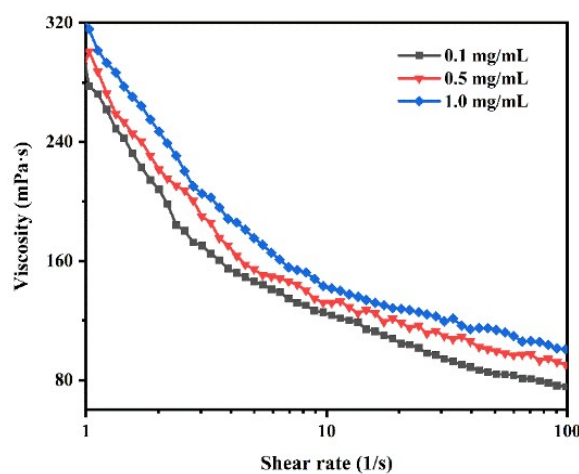

Fig. S2 Rheological properties of rCol III.

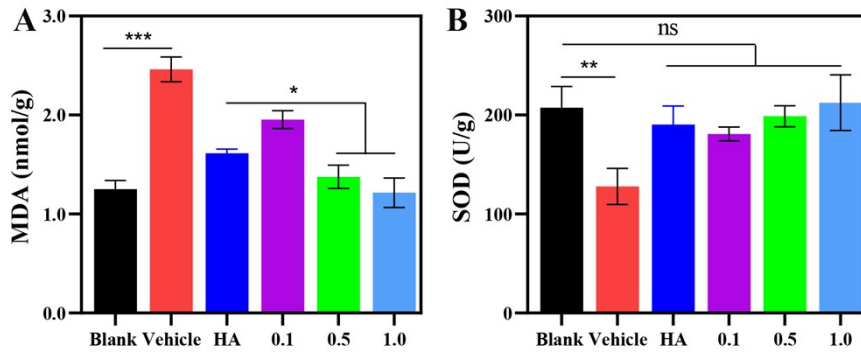

**Fig. S3** The content of SOD(A) and MDA(B) of mice skin injection of different groups, including blank, vehicle, HA, rCol III-0.1, rCol III-0.1, and rCol III-1.0 groups.

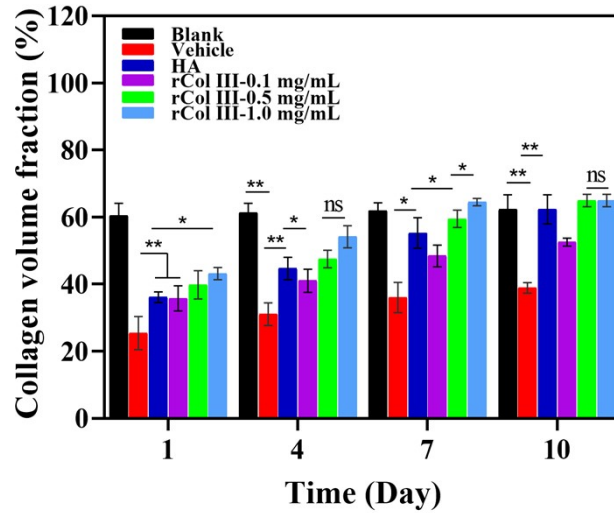

**Fig. S4** Quantifications of collagen content.

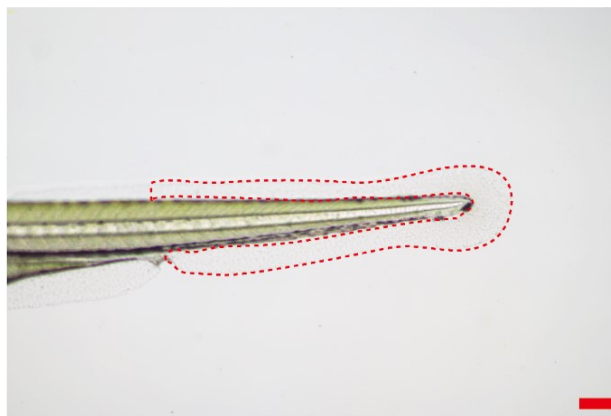

**Fig. S5** Typical plot of zebrafish anti-wrinkle efficacy of blank group. Scale bar: 200 nm.

**Table S1.** Quantitative calculation of the inhibition rate of caudal fin shrinkage in zebrafish.

| Groups             | Caudal fin                 |           | p-Value | Q(%)  |
|--------------------|----------------------------|-----------|---------|-------|
|                    | area (pixel <sup>2</sup> ) | Mean ± SE |         |       |
| Blank              | 1231264 ± 39074            |           | <0.0001 | -     |
| Vehicle            | 458947 ± 68338             |           | -       | -     |
| Polyphenols        | 774634 ± 90482             |           | 0.0141  | 40.88 |
| rCol III-0.1 mg/mL | 681055 ± 78462             |           | 0.0498  | 28.76 |
| rCol III-0.5 mg/mL | 857650 ± 97988             |           | 0.0046  | 51.62 |
